# Supplementary material for: Insights on Klebsiella pneumoniae Biofilms Assembled on Different Surfaces Using Phenotypic and Genotypic Approaches
Source: MDPI journal article supplement (doi:10.3390/microorganisms5020016), 2017-04-03
Supplement: s1 [file s1]

**Table S1:** Detailed location of the genomic regions found in accessory genome of the *K. pneumoniae* isolates.

| Genomic region | Contig n° (bp location) <sup>1</sup> |                     |                                                                             |
|----------------|--------------------------------------|---------------------|-----------------------------------------------------------------------------|
|                | Kp703                                | Kp45                | Kp2948                                                                      |
| 1              | 14 (33420-78461)                     | ---                 | ---                                                                         |
| 2              | 17 (31818-73195)                     | ---                 | ---                                                                         |
| 3              | 19 (1-3882)                          | ---                 | ---                                                                         |
| 4              | 40 (583642-589716)                   | ---                 | ---                                                                         |
| 5              | 74 (34702-47865)                     | ---                 | ---                                                                         |
| 6              | 121 (1-57266)                        | ---                 | ---                                                                         |
| 7              | 8 (85065-97181)                      | ---                 | ---                                                                         |
| 8              | 11 (27681-29438)                     | 52 (1-1271)         | ---                                                                         |
| 9              | 28 (1-11937); 3 (1-3191)             | 35 (57896-71598)    | ---                                                                         |
| 10             | 56 (191811-227997)                   | ---                 | ---                                                                         |
| 11             | ---                                  | 17 (43644-79326)    | ---                                                                         |
| 12             | ---                                  | 18 (1-12394)        | 33 (1-14831)                                                                |
| 13             | ---                                  | 30 (131058-168299)  | ---                                                                         |
| 14             | ---                                  | 34 (1-43459)        | ---                                                                         |
| 15             | 20 (74425-131652)                    | ---                 | 105 (64308-97514); 227 (1-18761); 191 (1-869);<br>176 (1-718); 193 (1-2953) |
| 16             | 26 (1-1856)                          | ---                 | 70 (1-1696); 94 (520)                                                       |
| 17             | ---                                  | 46 (145706-158835)  | 184 (1-12343)                                                               |
| 18             | ---                                  | 73 (1-6909)         | 21 (7549); 217 (1714); 76 (1-375)                                           |
| 19             | ---                                  | 108 (18731-29947)   | ---                                                                         |
| 20             | ---                                  | 108 (144770-183310) | ---                                                                         |
| 21             | ---                                  | ---                 | 110 (217714-234854)                                                         |
| 22             | ---                                  | ---                 | 137 (239588-250991)                                                         |
| 23             | ---                                  | ---                 | 8 (40463-77928); 137 (367234-368894)                                        |
| 24             | ---                                  | ---                 | 150 (1-25438)                                                               |
| 25             | ---                                  | ---                 | 256 (106917-144254)                                                         |
| 26             | ---                                  | ---                 | 158 (15631-27237)                                                           |
| 27             | ---                                  | ---                 | 72 (2392-7596)                                                              |
| 28             | ---                                  | ---                 | 2 (1-27296)                                                                 |
| 29             | ---                                  | ---                 | 24 (1-1133)                                                                 |
| 30             | ---                                  | ---                 | 195 (35740-64378); 29 (1071); 61 (61399-72132)                              |
| 31             | ---                                  | ---                 | 47 (1-3700)                                                                 |
| 32             | ---                                  | ---                 | 9 (1-16630)                                                                 |
| 33             | ---                                  | ---                 | 79 (1-22765)                                                                |
| 34             | ---                                  | ---                 | 12 (1-4894)                                                                 |
| 35             | ---                                  | ---                 | 140 (1-846)                                                                 |
| 36             | ---                                  | ---                 | 51 (1-2703)                                                                 |
| 37             | ---                                  | ---                 | 87 (1-1962)                                                                 |
| 38             | ---                                  | ---                 | 78 (1-1442)                                                                 |

<sup>1</sup>Some genomic regions assembled in a single contig for a given isolate were found to be completed but fragmented in several contigs in the genome of other isolate.
